# Supplementary material
Source: PubMed Central journal article supplement (PMC10170878)
Supplement: mmc1.pdf [file mmc1.pdf]

## Supplemental Materials

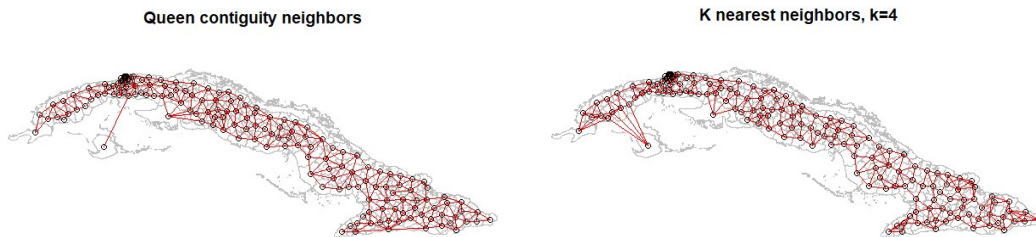

Figure .9: Spatial neighborhood structures.

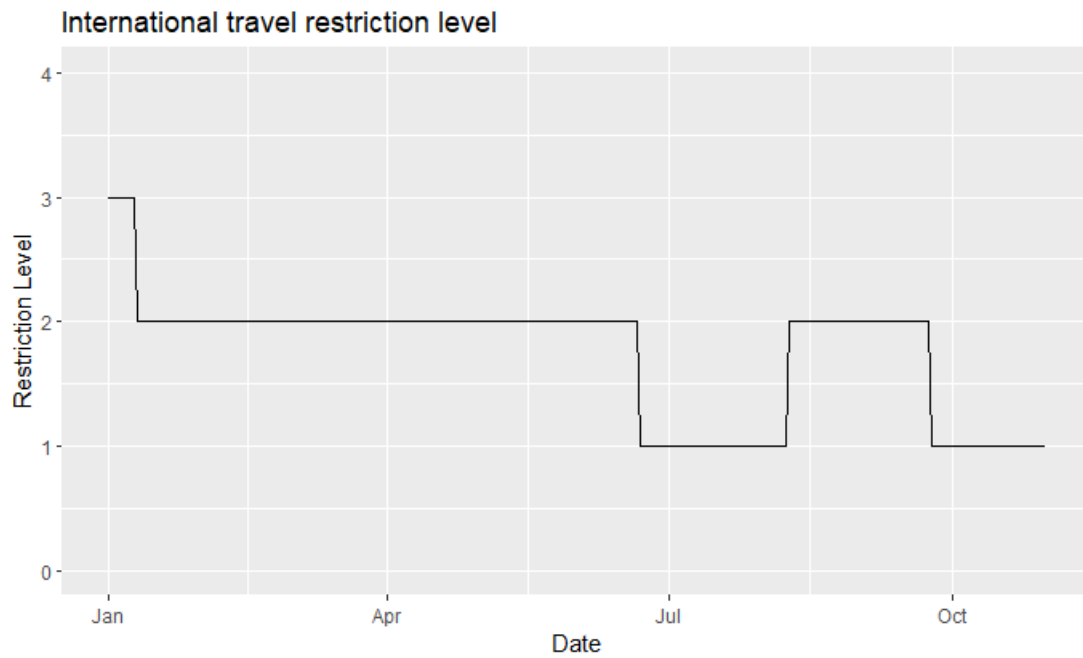

Figure .10: International travel restriction level in Cuba. 0: No measures, 1: Screening, 2: Quarantine arrivals from high-risk regions, 3: Ban on high-risk regions, 4: Total border closure.

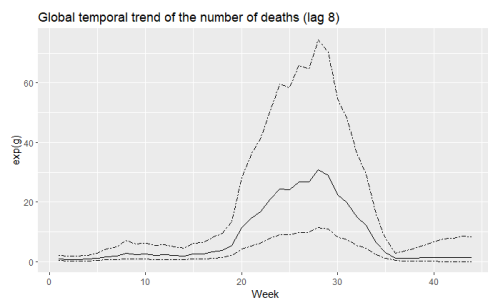

(a) Global temporal evolution of the number of deaths.

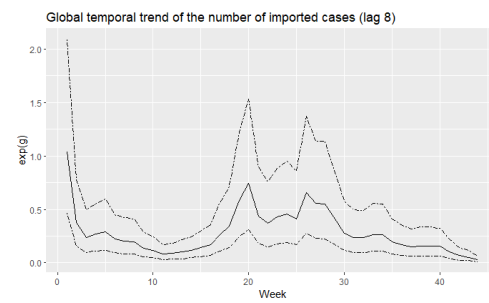

(b) Global temporal evolution of the number of imported cases.

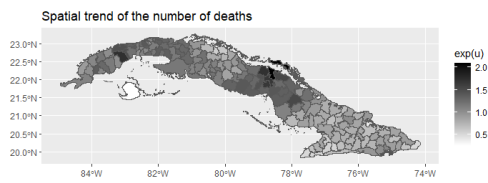

(c) Spatial risks for the number of deaths.

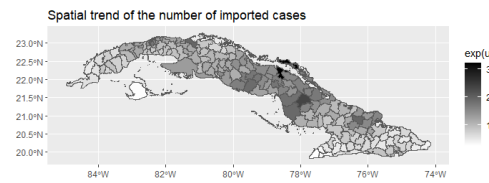

(d) Spatial risks for the number of imported cases.

Figure .11: Global temporal trends and spatial trends for the number of deaths and imported cases from Model 3.
